# Supplementary material
Source: PubMed Central journal article supplement (PMC4714192)
Supplement: 10.1074_M115.676882_jbc.M115.676882-18.pdf [file 10.1074_M115.676882_jbc.M115.676882-18.pdf]

## **MOVIE LEGENDS**

**Movie S1.** CARMIL2-GFP localization at the leading edge. Movie depicts the leading edge of the cell expressing CARMIL2-GFP (left), with tdTomato (right) as a control for cytoplasmic volume, from Figure 1D. Images were captured every 6 s. Movie is designed to play at 7 frames/s.

**Movie S2.** CARMIL2 C-Term-GFP localization at the leading edge. Movie depicts the leading edge of the cell expressing CARMIL2 C-Term-GFP (left), with tdTomato (right) as a control for cytoplasmic volume, from Figure 1D. Images were captured every 6 s. Movie is designed to play at 7 frames/s.

**Movie S3.** CARMIL2 27-aa-GFP localization at the leading edge. Movie depicts the leading edge of the cell expressing CARMIL2 27-aa-GFP (left), with tdTomato (right) as a control for cytoplasmic volume, from Figure 1D. Images were captured every 6 s. Movie is designed to play at 7 frames/s.

**Movie S4.** GFP localization at the leading edge, as a negative control. Movie depicts the leading edge of the cell expressing GFP (left), with tdTomato (right) as a control for cytoplasmic volume, from Figure 1D. Images were captured every 6 s. Movie is designed to play at 7 frames/s.

**Movie S5.** CARMIL2  $\Delta$ 11-aa-GFP localization at the leading edge. Movie depicts the leading edge of the cell expressing CARMIL2  $\Delta$ 11-aa-GFP (left), with tdTomato (right) as a control for cytoplasmic volume. Images were captured every 6 s. Movie is designed to play at 7 frames/s.

**Movie S6.** CARMIL2 GGG-GFP localization at the leading edge. Movie depicts the leading edge of the cell expressing CARMIL2 GGG-GFP (left), with tdTomato (right) as a control for cytoplasmic volume. Images were captured every 6 s. Movie is designed to play at 7 frames/s.

**Movie S7.** CARMIL2 EEE-GFP localization at the leading edge. Movie depicts the leading edge of the cell expressing CARMIL2 EEE-GFP (left), with tdTomato (right) as a control for cytoplasmic volume. Images were captured every 6 s. Movie is designed to play at 7 frames/s.

**Movie S8.** CARMIL2 C-Term  $\Delta$ 11-aa-GFP localization at the leading edge. Movie depicts the leading edge of the cell expressing CARMIL2 C-Term  $\Delta$ 11-aa-GFP (left), with tdTomato (right) as a control for cytoplasmic volume. Images were captured every 6 s. Movie is designed to play at 7 frames/s.

**Movie S9.** CARMIL2 C-Term GGG-GFP localization at the leading edge. Movie depicts the leading edge of the cell expressing CARMIL2 C-Term GGG-GFP (left), with tdTomato (right) as a control for cytoplasmic volume. Images were captured every 6 s. Movie is designed to play at 7 frames/s.

**Movie S10.** CARMIL2 C-Term EEE-GFP localization at the leading edge. Movie depicts the leading edge of the cell expressing CARMIL2 C-Term EEE-GFP (left), with tdTomato (right) as a control for cytoplasmic volume. Images were captured every 6 s. Movie is designed to play at 7 frames/s.

**Movie S11.** Untreated cell migrating over one hour. Images were captured every 60 s. Movie is designed to play at 7 frames/s.

**Movie S12.** Cell infected with scramble sequence shRNA control migrating over one hour. Images were captured every 60 s. Movie is designed to play at 7 frames/s.

**Movie S13.** CARMIL2-depleted cell migrating over one hour. Images were captured every 60 s. Movie is designed to play at 7 frames/s.

**Movie S14.** CARMIL2-depleted and shRNA-resistant wild-type CARMIL2 expression-rescue cell migrating over one hour. Images were captured every 60 s. Movie is designed to play at 7 frames/s.

**Movie S15.** CARMIL2-depleted and shRNA-resistant CARMIL2  $\Delta$ 11-aa expression-rescue cell migrating over one hour. Images were captured every 60 s. Movie is designed to play at 7 frames/s.

**Movie S16.** CARMIL2-depleted and shRNA-resistant CARMIL2 GGG expression-rescue cell migrating over one hour. Images were captured every 60 s. Movie is designed to play at 7 frames/s.

**Movie S17.** CARMIL2-depleted and shRNA-resistant CARMIL2 EEE expression-rescue cell migrating over one hour. Images were captured every 60 s. Movie is designed to play at 7 frames/s.
